# Supplementary material
Source: PubMed Central journal article supplement (PMC3837959)
Supplement: JB.02165-12_zjb999092919so1.pdf [file JB.02165-12_zjb999092919so1.pdf]

**Table S1.** Control quality primer pairs used in the verification of ICESluvan sequence assembly in *E. faecium* MM5-F9a and to confirm different regions of the element in *E. faecalis* OG5-F9a and JH5-F9a, *S. lutetiensis* 5-F9 and NEM760 as well as *S. gallinarum* 4-C11 and 4-G10. + Indicates region confirmed with PCR by other primer combinations.

| Primer   | Sequence               | ICESluvan position             | Approximate PCR product size in kb |         |         |                |         |                |
|----------|------------------------|--------------------------------|------------------------------------|---------|---------|----------------|---------|----------------|
|          |                        |                                | MM5-F9a                            | OG5-F9a | JH5-F9a | 5-F9           | NEM 760 | 4-C11          |
| Q1.forw  | gcacttttcaagcattttgtct | Orf2                           | 2                                  | 2       | 2       | 2              |         |                |
| Q1.rev   | tggaatggcgattttagctc   | Orf5                           |                                    |         |         |                |         |                |
| Q2.forw  | gaagacagcccagctcatct   | Orf5                           | 3.1                                | +       | +       |                |         |                |
| Q2.rev   | gggttagacgatggcagaaa   | Orf11/TraG                     |                                    |         |         |                |         |                |
| Q3.forw  | aatgctccacatggaacg     | Orf11/TraG                     | 2.7                                | 2.7     | 2.7     | 2.7            | 2.7     | -              |
| Q3.rev   | ccttgaacggcatagacat    | Orf13/VirB6                    |                                    |         |         |                |         |                |
| Q2.forw  | gaagacagcccagctcatct   | Orf5                           | +                                  | 5.8     | 5.8     |                |         |                |
| Q3.rev   | ccttgaacggcatagacat    | Orf13/VirB6                    |                                    |         |         |                |         |                |
| Q4.forw  | tttgcccctgttaccattc    | Orf13/VirB6                    | 2.6                                | 2.6     | 2.6     | 2.6            |         |                |
| Q4.rev   | acacggttccaaatctggtc   | Orf15/VirB4                    |                                    |         |         |                |         |                |
| Q5.forw  | gaccagatttgaaccgtgt    | Orf15/VirB4                    | 2.5                                | 2.5     | 2.5     | 2.5            | 2.5     | 2.5            |
| Q5.rev   | atccgcggtatctgtccat    | Orf16/PG hydrolase             |                                    |         |         |                |         |                |
| Q6.forw  | tttagccttagccaatgga    | Orf16/PG hydrolase             | 2.5                                | 2.5     | 2.5     | + <sup>a</sup> | 2.5     | +              |
| Q6.rev   | cgatcatcacgtcgaaacac   | Orf19/Tn1549 Orf13             |                                    |         |         |                |         |                |
| Q7.forw  | gctttgatctggccgactat   | Orf19/Tn1549 Orf13             | 2.5                                | 2.5     | 2.5     |                |         |                |
| Q7.rev   | gtccgacaggtcgatttcat   | Orf21-22 intergenic            |                                    |         |         |                |         |                |
| Q8.forw  | caagtggtaacgcagatga    | Orf21-22 intergenic            | 2.5                                | 2.5     | 2.5     | 2.5            |         |                |
| Q8.rev   | aaagatagccgtctcgtgt    | Orf26/Tn1549 Orf20             |                                    |         |         |                |         |                |
| Q9.forw  | acacgcagacggctatctt    | Orf26/Tn1549 Orf20             | 2.5                                | 2.5     | 2.5     |                |         |                |
| Q9.rev   | cgttctctccgacagtg      | Orf27/Tn1549 Orf21             |                                    |         |         |                |         |                |
| Q10.forw | ccaactgtcggaggaagaac   | Orf27/ Tn1549 Orf21            | 2.5                                | 2.5     | 2.5     |                |         |                |
| Q10.rev  | cgctgacggcatatagtcg    | Orf29/ Tn1549 Orf23            |                                    |         |         |                |         |                |
| Q11.forw | ccgtcagcgaaggaagta     | Orf29/ Tn1549 Orf23            | 2.3                                | +       | +       |                |         |                |
| Q11.rev  | gctttcgcatagtctccag    | Orf31/ TnpX                    |                                    |         |         |                |         |                |
| Q12.forw | ctttgcgaggccagacctt    | Orf30/ Tn1549 Orf24            | 2.5                                | +       | +       |                |         |                |
| Q12.rev  | ttagtctgttggtggcgttg   | Orf32                          |                                    |         |         |                |         |                |
| Q13.forw | gcacggcagtatgcagaga    | Orf32                          | 2.5                                | 2.5     | 2.5     | 2.5            |         |                |
| Q13.rev  | gcaagtggctttctctctgc   | Orf35-36 intergenic            |                                    |         |         |                |         |                |
| Q14.forw | ggaagcgcaggtctatctga   | Orf35                          | 2.4                                | 2.4     | 2.4     | 2.4            |         |                |
| Q14.rev  | ggaagagagcaggtcaacg    | Orf37/DNA primase              |                                    |         |         |                |         |                |
| Q15.forw | actccggcttgatgtgaaa    | Orf37/DNA primase              | 4.7                                | 4.7     | 4.7     |                |         |                |
| Q15.rev  | gtctgttccatttggcaag    | Orf39 / Tn1549 Orf25           |                                    |         |         |                |         |                |
| Q16.forw | gctgttagcgcagttgtcc    | Orf39 / Tn1549 Orf25           | 2.5                                | 2.5     | 2.5     |                |         |                |
| Q16.rev  | ttcaggctgtccacaatacg   | Orf40/ Tn1549 Orf26            |                                    |         |         |                |         |                |
| Q17.forw | cgatttcaaagtcacgtca    | Orf40/ Tn1549 Orf26            | 2.5                                | 2.5     | 2.5     |                |         |                |
| Q17.rev  | ctgaaagcgaagctcaag     | Orf43/ Tn1549 Orf28            |                                    |         |         |                |         |                |
| Q18.forw | aaacttcccggcttgatct    | Orf43/ Tn1549 Orf28            | 2.6                                | 2.6     | 2.6     |                |         |                |
| Q18.rev  | cgattacgcggttgcataa    | Orf47-48 intergenic            |                                    |         |         |                |         |                |
| Q19.forw | ggcaagtggatgatcagaat   | Orf47-48 intergenic            | 2.5                                | +       | +       |                |         |                |
| Q19.rev  | cgattggaatgatagttgc    | Orf50/ <i>vanY<sub>B</sub></i> |                                    |         |         |                |         |                |
| Q20.forw | tatcattcaatgcgatca     | Orf50/ <i>vanY<sub>B</sub></i> | 2.5                                | 2.5     | 2.5     | 2.5            |         | + <sup>b</sup> |
| Q20.rev  | cattcgcatcctaaaagc     | Orf52/ <i>vanH<sub>B</sub></i> |                                    |         |         |                |         | + <sup>b</sup> |
| Q21.forw | gctttaaaggatgccgaatg   | Orf52/ <i>vanH<sub>B</sub></i> | 2.5                                | 2.5     | 2.5     | + <sup>b</sup> | +       | + <sup>b</sup> |

|          |                         |                         |     |     |     |                  |   |   |  |
|----------|-------------------------|-------------------------|-----|-----|-----|------------------|---|---|--|
| Q21.rev  | tccaaatcgcctgtgacaa     | Orf55/ Tn1549 Orf7      |     |     |     |                  |   |   |  |
| Q22.forw | cgtaacgaggccaaaagcta    | Orf55/ Tn1549 Orf7      | 2.5 | 2.5 | 2.5 |                  |   |   |  |
| Q22.rev  | gttcatttctgcccttgc      | Orf59/ Tn1549 int       |     |     |     |                  |   |   |  |
| Q23.forw | attatgcacacgccacattc    | Orf59/ Tn1549 int       | 2.5 | 2.5 | +   | 2.5              | + | + |  |
| Q23.rev  | atccgctacagcttgttcgt    | Orf61/aggl. receptor    |     |     |     |                  |   |   |  |
| Q24.forw | cgaacaagctgtagcggatt    | Orf61/aggl. receptor    | 2.5 | 2.5 | 2.5 |                  |   |   |  |
| Q24.rev  | ggccaagtcccatgaaaga     | Orf61/aggl. receptor    |     |     |     |                  |   |   |  |
| Q25.forw | ccgagggattaaagcagaca    | Orf61/aggl. receptor    | 2.5 | 2.5 | 2.5 | 2.5              | - | - |  |
| Q25.rev  | ttccactcctcatcaaagtc    | Orf64/ helicase         |     |     |     |                  |   |   |  |
| Q26.forw | gccaccattcctcgtgatag    | Orf64/ helicase         | 2.5 | 2.5 | 2.5 |                  |   |   |  |
| Q26.rev  | cgttgtgacactcgttctctg   | Orf64/ helicase         |     |     |     |                  |   |   |  |
| Q27.forw | caccttcacccaatagtcaca   | Orf64/ helicase         | 2.5 | +   | +   |                  |   |   |  |
| Q27.rev  | gcttgatttctctgagttgctc  | Orf64/ helicase         |     |     |     |                  |   |   |  |
| Q28.forw | ccgatgagtcgtgaaaaaca    | Orf64/ helicase         | 2.5 | 2.5 | 2.5 | 2.5              |   |   |  |
| Q28.rev  | aagttgggcaaccaaatcaa    | Orf65                   |     |     |     |                  |   |   |  |
| Q29.forw | ttgatttggtgccaactt      | Orf65                   | 0.7 | +   | 0.7 |                  |   |   |  |
| Q29.rev  | catcccatgtattgaaacgaaa  | Orf66-67 intergenic     |     |     |     |                  |   |   |  |
| Q30.forw | tggttacaacaaactgcagaa   | Orf66-67 intergenic     | 2   | +   | +   | 2                |   |   |  |
| Q30.rev  | gggaccaaattgatagggta    | Orf68                   |     |     |     |                  |   |   |  |
| Q31.forw | gccaagtcacactggacat     | Orf68                   | 2.8 | +   | +   |                  |   |   |  |
| Q31.rev  | tgctcgtatttggtgctcag    | Orf70                   |     |     |     |                  |   |   |  |
| Q32.forw | ttggctatacgattggctca    | Orf70                   | 2.4 | +   | 2.4 | 2.4              | - | - |  |
| Q32.rev  | cgtttaaattgatcctggttctg | Orf74                   |     |     |     |                  |   |   |  |
| Q33.forw | cagaaccagatcaatttaaagc  | Orf74                   | 2.5 | 2.5 | 2.5 | 0.5 <sup>c</sup> | - | - |  |
| Q33.rev  | gcaaagcttcttgaacatt     | Orf77                   |     |     |     |                  |   |   |  |
| Q34.forw | aaaatgtccaagaagctttgc   | Orf77                   | 2.5 | 2.5 | 2.5 | -                | - | - |  |
| Q34.rev  | ggtatccgtgtaattgtgaca   | Orf79/MobC              |     |     |     |                  |   |   |  |
| Q35.forw | ttgctgaatcccaatagtc     | Orf79/MobC              | 2.4 | 2.4 | 2.4 | 2.5              |   |   |  |
| Q35.rev  | ttgacctgctctagcttctcat  | Orf80-81 intergenic     |     |     |     |                  |   |   |  |
| Q36.forw | gagaagctagagcaggtcaaa   | Orf80-81 intergenic     | 2.5 | 2.5 | 2.5 |                  |   |   |  |
| Q36.rev  | agccccagttatgatgatgag   | Orf82/ ABC permease     |     |     |     |                  |   |   |  |
| Q37.forw | cagtttagcaaaaggaaatcca  | Orf82/ ABC permease     | 2.7 | 2.7 | 2.7 | 2.7              |   |   |  |
| Q37.rev  | ccgctcttatacgttgaacc    | Orf83/ histidine kinase |     |     |     |                  |   |   |  |
| Q38.forw | cgaataaaaatggtgcgaaa    | Orf83/ histidine kinase | 3.6 | +   | +   | + <sup>d</sup>   | - |   |  |
| Q38.rev  | tctccgctgctattaactcca   | Orf86/ resolvase        |     |     |     |                  |   |   |  |

The blank spaces in the columns indicate not examined

<sup>a</sup> Tn5382/Tn1549 left end has been established previously by hybridization (20)

<sup>b</sup> The *vanB2* cluster and link to Tn5382/Tn1549 has been established previously by other PCRs (20)

<sup>c</sup> Sequence identical to 493 bp of ICES<sub>luvan</sub> orf77

<sup>d</sup> Confirmed by end sequencing

1 **Table S2.** Features and predicted functions of ORFs in the ICES<sub>Sluvan</sub> element

| ICES <sub>Sluvan</sub> | % G/C content | % aa identity | Size Aa | Product                                                                                                     | Homolog                     | Species                                          | NCBI reference |
|------------------------|---------------|---------------|---------|-------------------------------------------------------------------------------------------------------------|-----------------------------|--------------------------------------------------|----------------|
| 1                      | 52.4          | 85            | 13      | C-terminal fragment of 23S rRNA (uracil-5)-methyltransferase RumA                                           | SP70585_1067                | <i>S. pneumoniae</i> 70585                       | CP000918       |
| 2                      | 33.3          | 95            | 55      | Hypothetical protein                                                                                        | SP70585_1068                | <i>S. pneumoniae</i> 70585                       | CP000918       |
| 3                      | 36.2          | 82            | 57      | Hypothetical protein                                                                                        | SP70585_1069                | <i>S. pneumoniae</i> 70585                       | CP000918       |
| 4                      | 40.8          | 94            | 272     | Replication initiator protein                                                                               | ICES <sub>Sde</sub> 3396_66 | <i>S. dysgalactiae</i> subsp. equisimilis NS3396 | EU142041       |
| 5                      | 44.2          | 98            | 451     | Cytosine-specific methyltransferase                                                                         | ICES <sub>Sde</sub> 3396_65 | <i>S. dysgalactiae</i> subsp. equisimilis NS3396 | EU142041       |
| 6                      | 38.2          | 95            | 142     | Hypothetical protein                                                                                        | ICES <sub>Sde</sub> 3396_64 | <i>S. dysgalactiae</i> subsp. equisimilis NS3396 | EU142041       |
| 7                      | 40.9          | 97            | 127     | Hypothetical protein                                                                                        | ICES <sub>Sde</sub> 3396_63 | <i>S. dysgalactiae</i> subsp. equisimilis NS3396 | EU142041       |
| 8                      | 36.3          | 94            | 79      | Hypothetical protein                                                                                        | ICES <sub>Sde</sub> 3396_62 | <i>S. dysgalactiae</i> subsp. equisimilis NS3396 | EU142041       |
| 9                      | 37.8          | 81            | 194     | CAAX amino terminal protease self- immunity protein                                                         | ICES <sub>Sde</sub> 3396_61 | <i>S. dysgalactiae</i> subsp. equisimilis NS3396 | EU142041       |
| 10                     | 39.2          | 94            | 174     | Hypothetical protein                                                                                        | ICES <sub>Sde</sub> 3396_60 | <i>S. dysgalactiae</i> subsp. equisimilis NS3396 | EU142041       |
| 11                     | 40.8          | 96            | 604     | Conjugal transfer protein, TraG family coupling protein (pseudogene because of frame shift after codon 465) | ICES <sub>Sde</sub> 3396_59 | <i>S. dysgalactiae</i> subsp. equisimilis NS3396 | EU142041       |
| 12                     | 44.5          | 96            | 84      | Putative membrane protein                                                                                   | ICES <sub>Sde</sub> 3396_58 | <i>S. dysgalactiae</i> subsp. equisimilis NS3396 | EU142041       |
| 13                     | 41.9          | 99            | 284     | Putative plasmid conjugal transfer protein, TrbL/VirB6 family                                               | ICES <sub>Sde</sub> 3396_57 | <i>S. dysgalactiae</i> subsp. equisimilis NS3396 | EU142041       |
| 14                     | 39.7          | 97            | 151     | Hypothetical protein, PrgI family component                                                                 | SP70585_1080                | <i>S. pneumoniae</i> 70585                       | CP000918       |
| 15                     | 40.8          | 99            | 776     | Putative conjugal transfer protein, VirB4 ATPase                                                            | ICES <sub>Sde</sub> 3396_56 | <i>S. dysgalactiae</i> subsp. equisimilis NS3396 | EU142041       |
| 16                     | 43.1          | 99            | 933     | <i>N</i> -acetylmuramoyl L-alanine amidase, peptidoglycan hydrolase                                         | ICES <sub>Sde</sub> 3396_55 | <i>S. dysgalactiae</i> subsp. equisimilis NS3396 | EU142041       |
| 17                     | 32.6          | 94            | 281     | Abortive infection protein AbiGII (pseudogene terminated by Tn1549 insertion after codon 251)               | ICES <sub>Sde</sub> 3396_54 | <i>S. dysgalactiae</i> subsp. equisimilis NS3396 | EU142041       |
| 18                     | 52.3          | 100           | 399     | Hypothetical protein                                                                                        | Tn1549 Orf 13               | <i>E. faecalis</i> BM4382                        | AF192329       |
| 19                     | 57.3          | 100           | 70      | Hypothetical protein                                                                                        | Tn1549 Orf 14               | <i>E. faecalis</i> BM4382                        | AF192329       |
| 20                     | 53.6          | 99            | 160     | Hypothetical protein                                                                                        | Tn1549 Orf 15               | <i>E. faecalis</i> BM4382                        | AF192329       |
| 21                     | 51.9          | 99            | 564     | Putative conjugal transfer protein, TraG family coupling protein                                            | Tn1549 Orf 16               | <i>E. faecalis</i> BM4382                        | AF192329       |
| 22                     | 57.4          | 100           | 82      | Putative conjugal transfer protein                                                                          | HMPREF0348_0460             | <i>E. faecalis</i> (TX0104)                      | ACGL01000032   |
| 23                     | 52.3          | 100           | 290     | Putative conjugal transfer protein                                                                          | Tn1549 Orf 17               | <i>E. faecalis</i> BM4382                        | AF192329       |
| 24                     | 54.1          | 100           | 180     | Adenine-specific methyltransferase                                                                          | Tn1549 Orf 18               | <i>E. faecalis</i> BM4382                        | AF192329       |

|    |      |     |      |                                                                                                            |                         |                                        |                 |
|----|------|-----|------|------------------------------------------------------------------------------------------------------------|-------------------------|----------------------------------------|-----------------|
| 25 | 52.0 | 100 | 140  | Hypothetical protein                                                                                       | Tn1549 Orf 19           | <i>E. faecalis</i> BM4382              | AF192329        |
| 26 | 55.1 | 100 | 799  | Putative conjugal transfer protein, VirB4 APTase                                                           | Tn1549 Orf 20           | <i>E. faecalis</i> BM4382              | AF192329        |
| 27 | 58.6 | 100 | 663  | DNA-repair protein                                                                                         | Tn1549 Orf 21           | <i>E. faecalis</i> BM4382              | AF192329        |
| 28 | 52.4 | 100 | 83   | Hypothetical protein                                                                                       | Tn1549 Orf 22           | <i>E. faecalis</i> BM4382              | AF192329        |
| 29 | 59.2 | 100 | 409  | Putative bacteriocin                                                                                       | Tn1549 Orf 23           | <i>E. faecalis</i> BM4382              | AF192329        |
| 30 | 57.7 | 99  | 693  | DNA topoisomerase III-like protein (pseudogene terminated by insertion of a 9-kb element after codon 474 ) | Tn1549 Orf 24           | <i>E. faecalis</i> BM4382              | AF192329        |
| 31 | 47.6 | 83  | 620  | TnpX site-specific recombinase                                                                             | FAEPRAA2165_00064       | <i>F. prausnitzii</i> A2-165           | NZ_ACOP02000000 |
| 32 | 55.9 | 89  | 98   | Hypothetical protein                                                                                       | FAEPRAA2165_00836       | <i>F. prausnitzii</i> A2-165           | NZ_ACOP02000000 |
| 33 | 39.9 | 55  | 350  | Transposase (pseudogene because of frame shift after codon 251), IS30 family                               | LJ0275                  | <i>Lactobacillus johnsonii</i> NCC 533 | AE017198        |
| 34 | 31.7 | 40  | 162  | Putative VanZ family protein                                                                               | Pjdr2_3222              | <i>Paenibacillus</i> sp. JDR-2         | NC_012914       |
| 35 | 59.0 | 96  | 108  | Hypothetical protein                                                                                       | FAEPRAA2165_00838       | <i>F. prausnitzii</i> A2-165           | NZ_ACOP02000000 |
| 36 | 56.3 | 88  | 502  | Putative mobilisation protein                                                                              | FAEPRAA2165_00070       | <i>F. prausnitzii</i> A2-165           | NZ_ACOP02000000 |
| 37 | 57.2 | 93  | 633  | Putative DNA primase                                                                                       | FAEPRAA2165_00840       | <i>F. prausnitzii</i> A2-165           | NZ_ACOP02000000 |
| 38 | 45.3 | 70  | 63   | Hypothetical protein                                                                                       | FAEPRAA2165_00072       | <i>F. prausnitzii</i> A2-165           | NZ_ACOP02000000 |
| 39 | 58.1 | 100 | 1306 | Hypothetical protein, LtrC family membrane associated enzyme involved in lipid metabolism                  | Tn1549 Orf 25           | <i>E. faecalis</i> BM4382              | AF192329        |
| 40 | 56.8 | 100 | 314  | Hypothetical protein                                                                                       | Tn1549 Orf 26           | <i>E. faecalis</i> BM4382              | AF192329        |
| 41 | 49.5 | 100 | 129  | Hypothetical protein                                                                                       | Tn1549 Orf 27           | <i>E. faecalis</i> BM4382              | AF192329        |
| 42 | 56.9 | 100 | 118  | Hypothetical protein                                                                                       | HMPREF0348_0474         | <i>E. faecalis</i> (TX0104)            | ACGL01000032    |
| 43 | 52.3 | 100 | 442  | Putative mobilisation protein, MOB <sub>p</sub> family relaxase                                            | Tn1549 Orf 28           | <i>E. faecalis</i> BM4382              | AF192329        |
| 44 | 53.0 | 100 | 109  | Putative mobilisation protein, MobC                                                                        | Tn1549 Orf 29           | <i>E. faecalis</i> BM4382              | AF192329        |
| 45 | 51.6 | 100 | 123  | Hypothetical protein                                                                                       | Tn1549 Orf 30           | <i>E. faecalis</i> BM4382              | AF192329        |
| 46 | 52.2 | 100 | 61   | Transposase                                                                                                | HMPREF0348_0478         | <i>E. faecalis</i> (TX0104)            | ACGL01000032    |
| 47 | 43.5 | 100 | 55   | Hypothetical protein                                                                                       | HMPREF0348_0479         | <i>E. faecalis</i> (TX0104)            | ACGL01000032    |
| 48 | 46.5 | 100 | 220  | Response regulator, VanRB                                                                                  | <i>vanR<sub>B</sub></i> | <i>E. faecalis</i> BM4382              | AF192329        |
| 49 | 45.9 | 99  | 447  | Sensor protein, histidine kinase VanSB                                                                     | <i>vanS<sub>B</sub></i> | <i>E. faecalis</i> BM4382              | AF192329        |
| 50 | 47.0 | 99  | 268  | Carboxypeptidase VanYB                                                                                     | <i>vanY<sub>B</sub></i> | <i>E. faecalis</i> BM4382              | AF192329        |
| 51 | 45.2 | 100 | 282  | Vancomycin resistance protein VanW                                                                         | <i>vanW</i>             | <i>E. faecalis</i> BM4382              | AF192329        |
| 52 | 50.6 | 100 | 323  | Vancomycin resistance protein VanHB                                                                        | <i>vanH<sub>B</sub></i> | <i>E. faecalis</i> BM4382              | AF192329        |
| 53 | 49.8 | 100 | 342  | Vancomycin B-type resistance protein VanB2                                                                 | <i>vanB</i>             | <i>E. faecalis</i> BM4382              | AF192329        |
| 54 | 47.6 | 99  | 202  | Vancomycin B-type resistance protein VanXB                                                                 | <i>vanX<sub>B</sub></i> | <i>E. faecalis</i> BM4382              | AF192329        |
| 55 | 51.2 | 100 | 258  | Hypothetical protein                                                                                       | Tn1549 Orf7             | <i>E. faecalis</i> BM4382              | AF192329        |
| 56 | 55.6 | 100 | 77   | Hypothetical protein                                                                                       | Tn1549 Orf8             | <i>E. faecalis</i> BM4382              | AF192329        |
| 57 | 58.0 | 100 | 80   | Hypothetical protein                                                                                       | EFXG_01475              | <i>E. faecium</i> C68                  | NZ_GG703717     |
| 58 | 43.3 | 100 | 66   | Excisionase                                                                                                | Tn1549 xis              | <i>E. faecalis</i> BM4382              | AF192329        |
| 59 | 48.3 | 100 | 424  | Integrase                                                                                                  | Tn1549 int              | <i>E. faecalis</i> BM4382              | AF192329        |

|    |      |     |      |                                                                                            |                    |                                                  |                 |
|----|------|-----|------|--------------------------------------------------------------------------------------------|--------------------|--------------------------------------------------|-----------------|
| 60 | 35.4 | 89  | 196  | Abortive infection protein AbiGI                                                           | ICESde3396_53      | <i>S. dysgalactiae</i> subsp. equisimilis NS3396 | EU142041        |
| 61 | 41.7 | 96  | 1631 | Agglutinin receptor precursor                                                              | ICESde3396_52      | <i>S. dysgalactiae</i> subsp. equisimilis NS3396 | EU142041        |
| 62 | 41.7 | 92  | 63   | Putative Ca <sup>2+</sup> binding protein                                                  | ICESde3396_50      | <i>S. dysgalactiae</i> subsp. equisimilis NS3396 | EU142041        |
| 63 | 38.6 | 96  | 183  | Hypothetical protein                                                                       | ICESde3396_49      | <i>S. dysgalactiae</i> subsp. equisimilis NS3396 | EU142041        |
| 64 | 41.1 | 95  | 2276 | SNF2-related helicase (pseudogene because of frame shifts after codons 775 and 784)        | ICESde3396_48      | <i>S. dysgalactiae</i> subsp. equisimilis NS3396 | EU142041        |
| 65 | 40.0 | 83  | 99   | Hypothetical protein                                                                       | ICESde3396_47      | <i>S. dysgalactiae</i> subsp. equisimilis NS3396 | EU142041        |
| 66 | 33.3 | 78  | 99   | Hypothetical protein                                                                       | ICESde3396_46      | <i>S. dysgalactiae</i> subsp. equisimilis NS3396 | EU142041        |
| 67 | 29.0 | 25  | 401  | Putative uncharacterised phage related protein                                             | StrS4_010100015457 | <i>Streptomyces</i> sp. S4                       | NZ_CADY01000120 |
| 68 | 29.1 | 27  | 442  | Putative uncharacterised phage related protein                                             | StrS4_010100015462 | <i>Streptomyces</i> sp. S4                       | NZ_CADY01000120 |
| 69 | 39.4 | 93  | 418  | Transposase (pseudogene because of frame shift after codon 33), ISL3 family                | SsuiDRAFT_2686     | <i>S. suis</i> 89/1591                           | NZ_AAFA03000023 |
| 70 | 40.0 | 96  | 212  | Hypothetical protein                                                                       | ICESde3396_45      | <i>S. dysgalactiae</i> subsp. equisimilis NS3396 | EU142041        |
| 71 | 38.2 | 88  | 258  | Putative DNA primase                                                                       | ICESde3396_44      | <i>S. dysgalactiae</i> subsp. equisimilis NS3396 | EU142041        |
| 72 | 39.9 | 97  | 75   | Hypothetical protein                                                                       | ICESde3396_43      | <i>S. dysgalactiae</i> subsp. equisimilis NS3396 | EU142041        |
| 73 | 35.4 | 96  | 129  | Hypothetical protein                                                                       | ICESde3396_42      | <i>S. dysgalactiae</i> subsp. equisimilis NS3396 | EU142041        |
| 74 | 34.4 | 75  | 96   | Hypothetical protein                                                                       | ICESde3396_41      | <i>S. dysgalactiae</i> subsp. equisimilis NS3396 | EU142041        |
| 75 | 37.7 | 100 | 168  | Antidote epsilon protein, zeta toxin regulator                                             | SsuiDRAFT_3902     | <i>S. suis</i> 89/1591                           | NZ_AAFA03000023 |
| 76 | 44.0 | 99  | 256  | Zeta-toxin/ Signal recognition particle                                                    | SsuiDRAFT_3901     | <i>S. suis</i> 89/1591                           | NZ_AAFA03000023 |
| 77 | 29.5 | 100 | 835  | Hypothetical protein                                                                       | SsuiDRAFT_3900     | <i>S. suis</i> 89/1591                           | NZ_AAFA03000023 |
| 78 | 38.9 | 81  | 119  | Hypothetical protein                                                                       | SsuiDRAFT_3899     | <i>S. suis</i> 89/1591                           | NZ_AAFA03000023 |
| 79 | 35.0 | 95  | 121  | Putative mobilisation protein, MobC family                                                 | SsuiDRAFT_3898     | <i>S. suis</i> 89/1591                           | NZ_AAFA03000023 |
| 80 | 34.7 | 92  | 621  | Putative relaxase, MOB <sub>p</sub> family                                                 | SsuiDRAFT_3897     | <i>S. suis</i> 89/1591                           | NZ_AAFA03000023 |
| 81 | 34.3 | 82  | 249  | ATPase component, ABC-type antimicrobial peptide transport system                          | smi_1460           | <i>S. mitis</i> B6                               | FN568063        |
| 82 | 32.5 | 67  | 672  | ABC transporter permease, ABC-type antimicrobial peptide transport system                  | smi_1459           | <i>S. mitis</i> B6                               | FN568063        |
| 83 | 27.5 | 65  | 524  | Histidine kinase                                                                           | smi_1458           | <i>S. mitis</i> B6                               | FN568063        |
| 84 | 30.5 | 74  | 198  | Response regulator                                                                         | smi_1457           | <i>S. mitis</i> B6                               | FN568063        |
| 85 | 30.2 | 56  | 73   | Transcriptional regulator, Cro/CI family                                                   | SsuiDRAFT_3888     | <i>S. suis</i> 89/1591                           | NZ_AAFA03000023 |
| 86 | 33.6 | 98  | 579  | Site-specific recombinase, resolvase family (lack 1 amino acid compared to SsuiDRAFT_2393) | SsuiDRAFT_2393     | <i>S. suis</i> 89/1591                           | NZ_AAFA03000023 |
